# Supplementary material
Source: publisher site journal article supplement (https://kjim.org/upload/media/kjim-2025-182-Supplementary-Table-1.pdf)
Supplement: Supplementary file 1 [file kjim-2025-182-Supplementary-Table-1.pdf]

**Supplementary Table 1. Comparison of Patients with SAB and non-SAB**

| Characteristic                             | SAB (n = 100) | Non-SAB (n = 58) | Total (n = 158) | p value |
|--------------------------------------------|---------------|------------------|-----------------|---------|
| Age (yr)                                   | 62 ± 14.7     | 66.7 ± 11.5      | 63.7 ± 13.8     | 0.038   |
| Male                                       | 50 (50.0)     | 31 (53.4)        | 81 (51.3)       | 0.676   |
| Hospital duration (d)                      | 22 (14–36)    | 19 (12–28)       | 21 (13–33)      | 0.232   |
| Comorbidities                              |               |                  |                 |         |
| Hypertension                               | 83 (83.0)     | 49 (84.5)        | 132 (83.5)      | 0.809   |
| Diabetes mellitus                          | 56 (56.0)     | 35 (60.3)        | 91 (57.6)       | 0.594   |
| Coronary artery disease                    | 15 (15.0)     | 6 (10.3)         | 21 (13.3)       | 0.406   |
| Stroke                                     | 7 (7.0)       | 4 (6.9)          | 11 (7.0)        | > 0.999 |
| Congestive heart disease                   | 4 (4.0)       | 1 (1.7)          | 5 (3.2)         | 0.653   |
| Liver cirrhosis                            | 2 (2.0)       | 1 (1.7)          | 3 (1.9)         | > 0.999 |
| Immunocompromised                          | 0             | 3 (5.2)          | 3 (1.9)         | 0.048   |
| Polycystic kidney disease                  | 0             | 1 (1.7)          | 1 (0.6)         | 0.367   |
| Type of VA                                 |               |                  |                 |         |
| TCC                                        | 17 (17.0)     | 12 (20.7)        | 29 (18.4)       | 0.564   |
| AVF                                        | 11 (11.0)     | 5 (8.6)          | 16 (10.1)       | 0.633   |
| AVG                                        | 72 (72.0)     | 41 (70.7)        | 113 (71.5)      | 0.860   |
| Location of VA                             |               |                  |                 |         |
| Neck                                       | 18 (18.0)     | 12 (20.7)        | 30 (19)         | 0.678   |
| Upper arm                                  | 47 (47.0)     | 27 (46.6)        | 74 (46.8)       | 0.957   |
| Forearm                                    | 34 (34.0)     | 16 (27.6)        | 50 (31.6)       | 0.403   |
| Thigh                                      | 1 (1.0)       | 3 (5.2)          | 4 (2.5)         | 0.140   |
| MRSA colonization <sup>a)</sup>            | 11/60 (18.3)  | 4/34 (11.8)      | 15/94 (16.0)    | 0.560   |
| Positive wound culture <sup>b)</sup>       | 82/96 (85.4)  | 27/52 (51.9)     | 109/148 (73.6)  | < 0.001 |
| Metastatic infections                      | 21 (21.0)     | 5 (8.6)          | 26 (16.5)       | 0.043   |
| Septic shock                               | 4 (4.0)       | 1 (1.7)          | 5 (3.2)         | 0.653   |
| ICU care                                   | 9 (9.0)       | 3 (5.2)          | 12 (7.6)        | 0.537   |
| Antibiotic duration (d)                    | 27 (17–35)    | 22 (16–33)       | 23 (17–34)      | 0.317   |
| Surgical intervention                      | 96 (96.0)     | 53 (91.4)        | 149 (94.3)      | 0.290   |
| Re-operation                               | 43 (43.0)     | 14 (24.1)        | 57 (36.1)       | 0.017   |
| Clinical outcome                           |               |                  |                 |         |
| All-cause mortality                        | 6 (6.0)       | 1 (1.7)          | 7 (4.4)         | 0.424   |
| 90-day recurrence                          | 6/76 (7.9)    | 3/46 (6.5)       | 9/122(7.4)      | > 0.999 |
| 90-day infection related treatment failure | 12/80 (15.0)  | 3/46 (6.5)       | 15/126 (11.9)   | 0.253   |

Values are presented as mean ± standard deviation, number (%), or median (interquartile range).

SAB, *Staphylococcus aureus* bacteremia; VA, vascular access; TCC, tunneled cuffed catheter; AVF, arteriovenous fistula; AVG, arteriovenous graft; MRSA, methicillin-resistant *Staphylococcus aureus*; ICU, intensive care unit.

<sup>a)</sup>The denominator is the number of patients who collected nasal swab specimens to detect MRSA colonization.

<sup>b)</sup>The denominator refers to the number of patients who underwent microbiologic culture for non-blood specimens.
